# Supplementary material
Source: PubMed Central journal article supplement (PMC7749381)

**A****Hydroxychloroquine**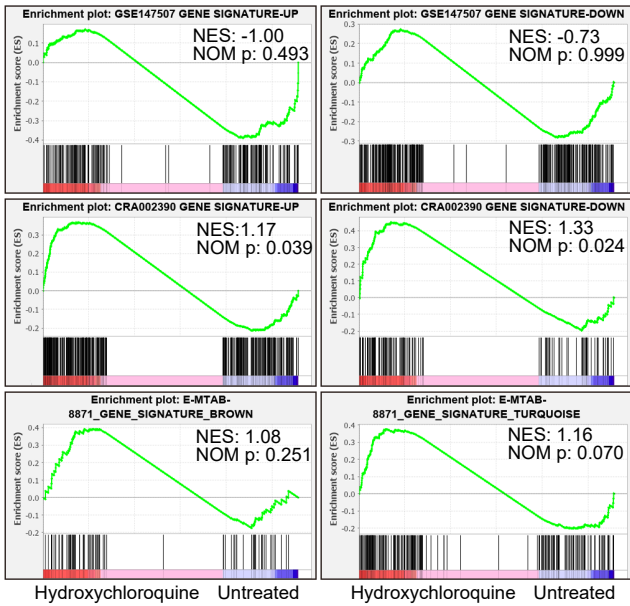**B****IFN- $\gamma$** 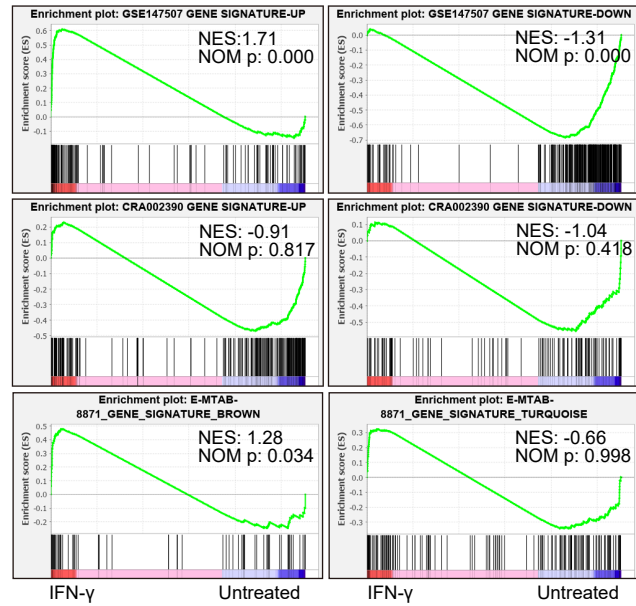**C****Alemtuzumab**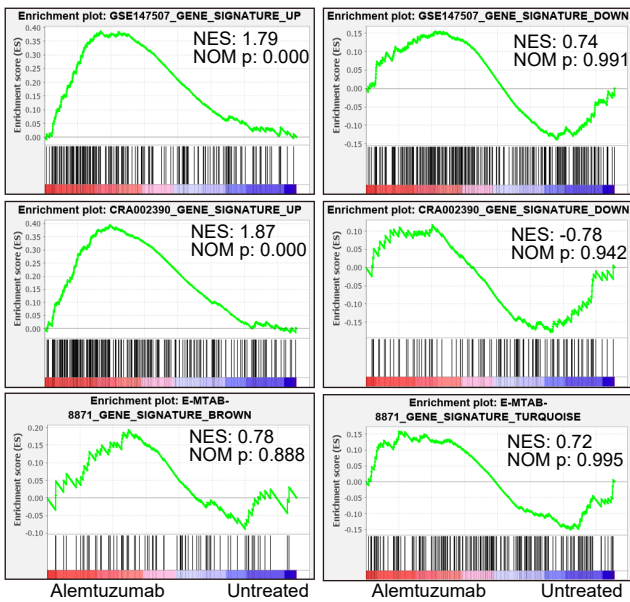**D****Alefacept**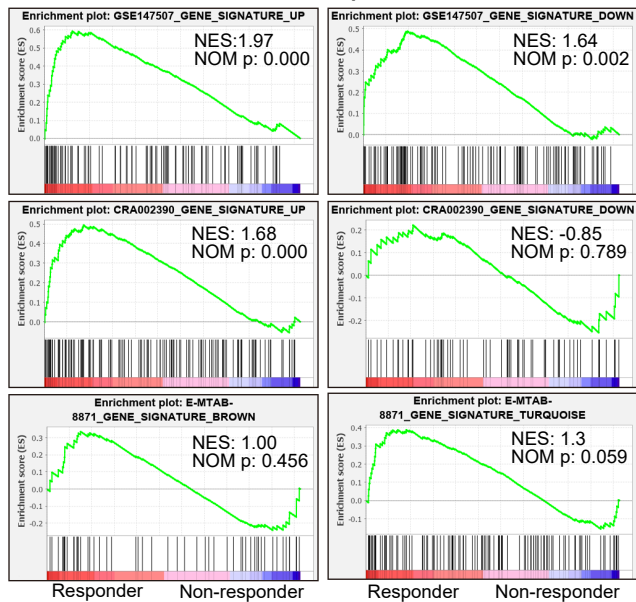

Supplement: mmc10.pdf [file mmc10.pdf]

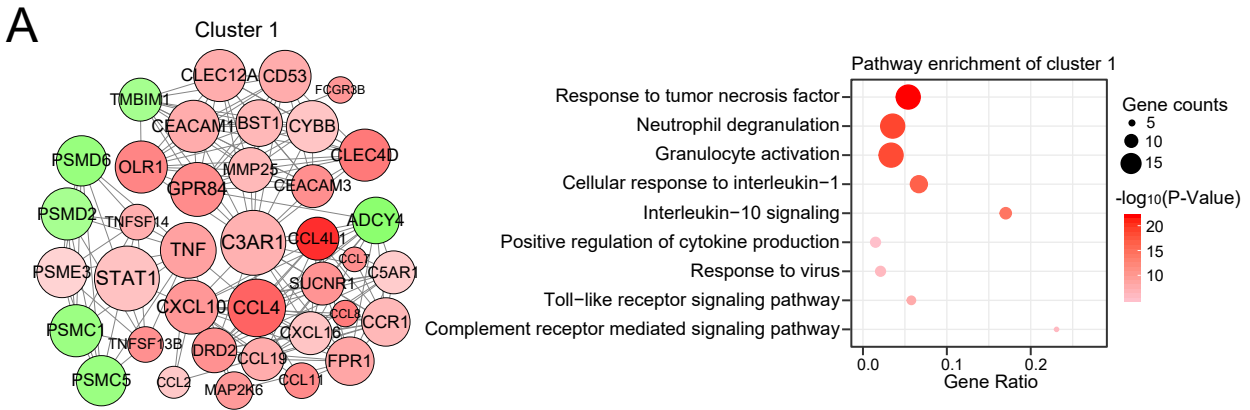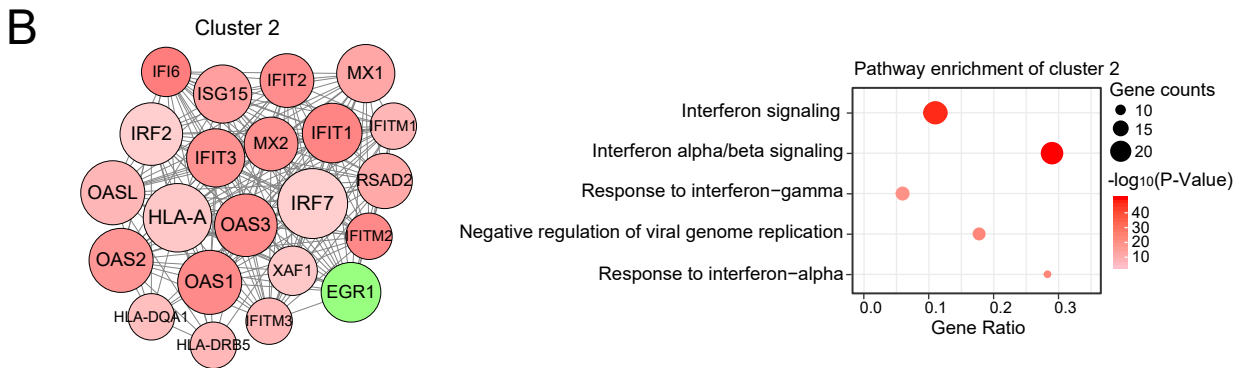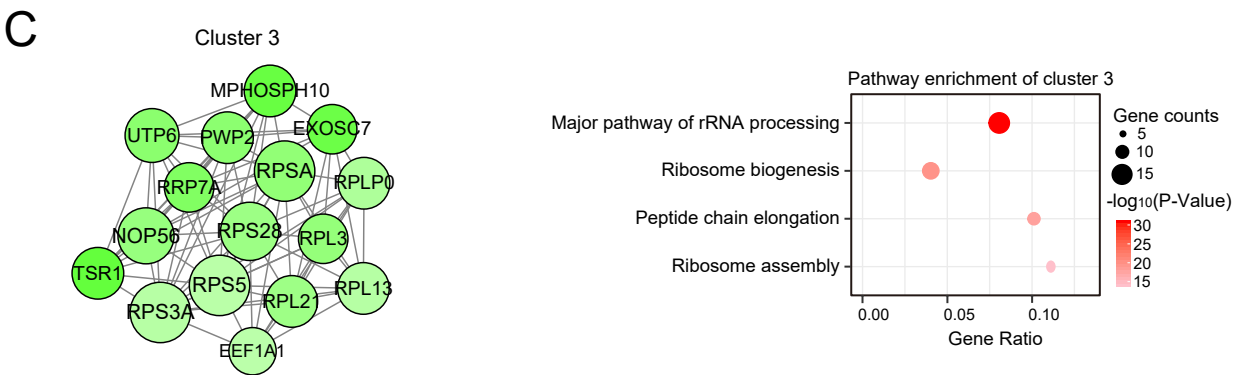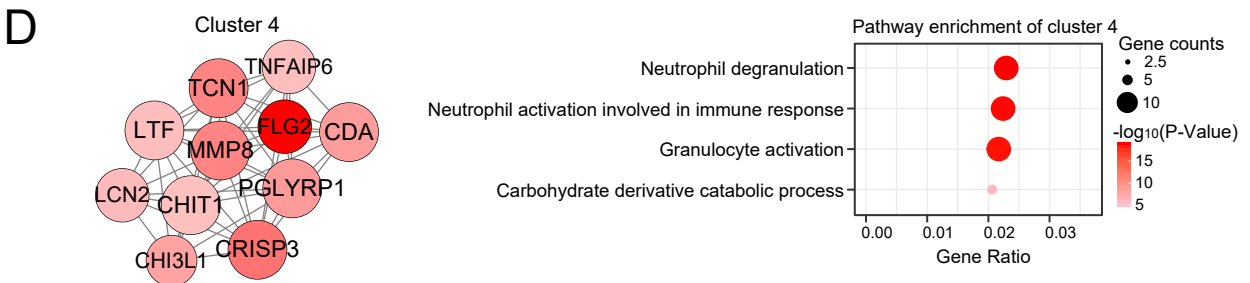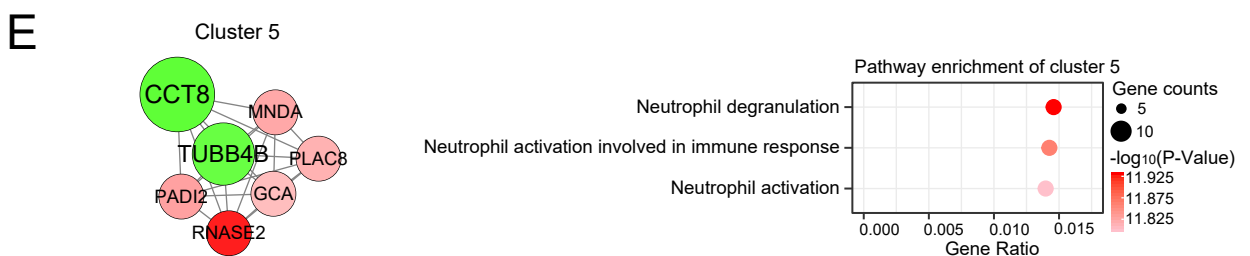

Supplement: mmc2.pdf [file mmc2.pdf]

**A**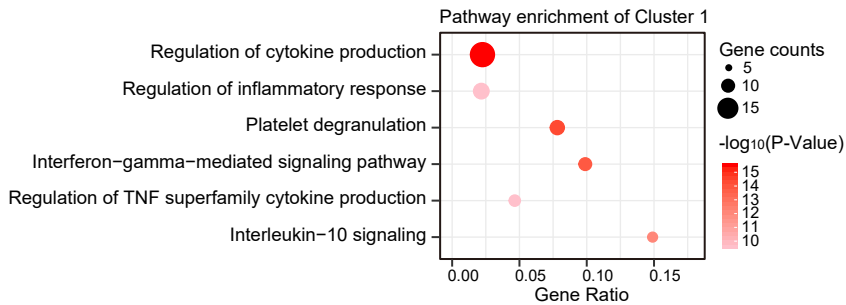**B**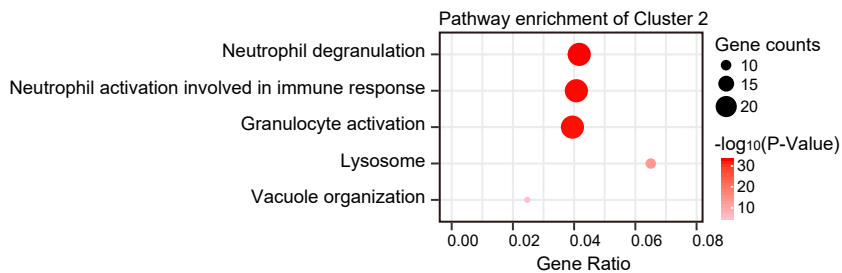**C**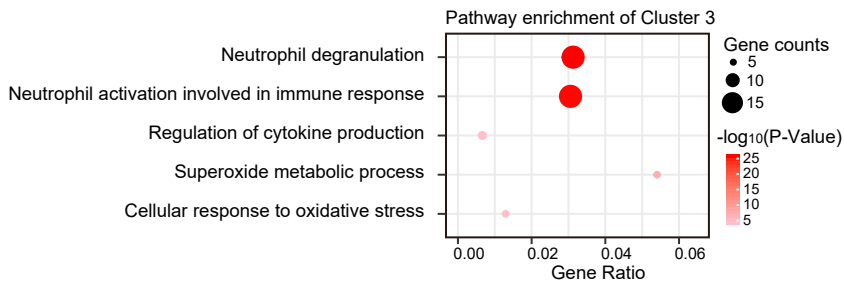**D**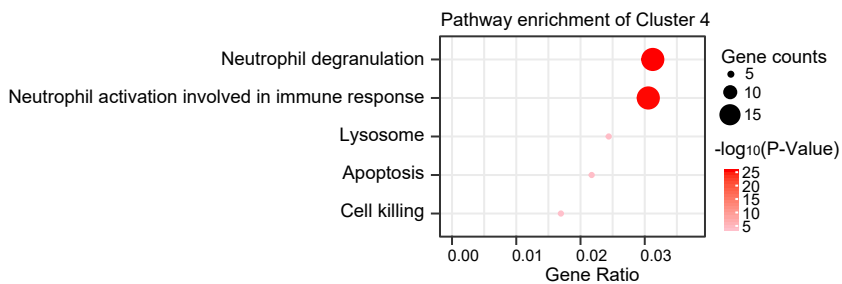

Supplement: mmc4.pdf [file mmc4.pdf]

### Gene signature-related disease analysis

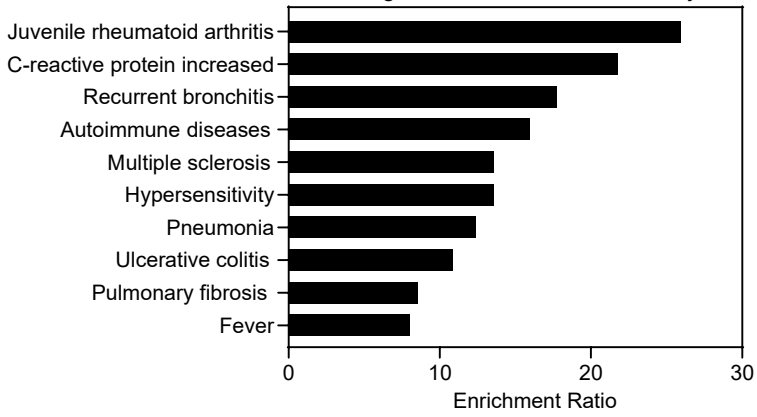

Supplement: mmc6.pdf [file mmc6.pdf]

**A****Baclofen**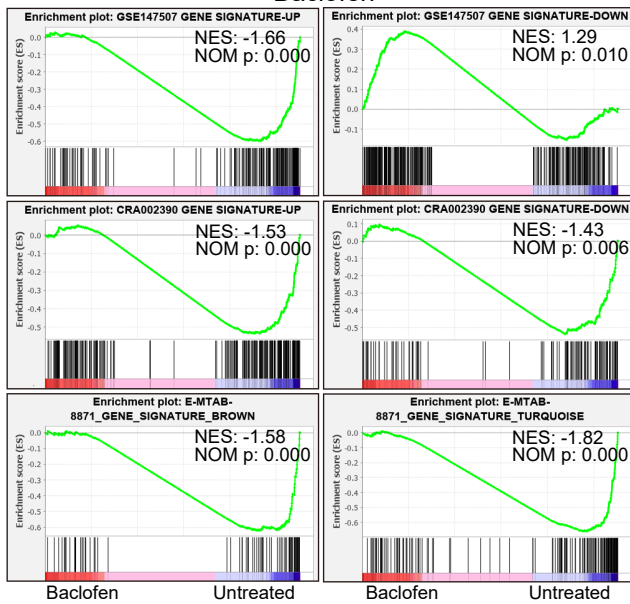**B****Adalimumab**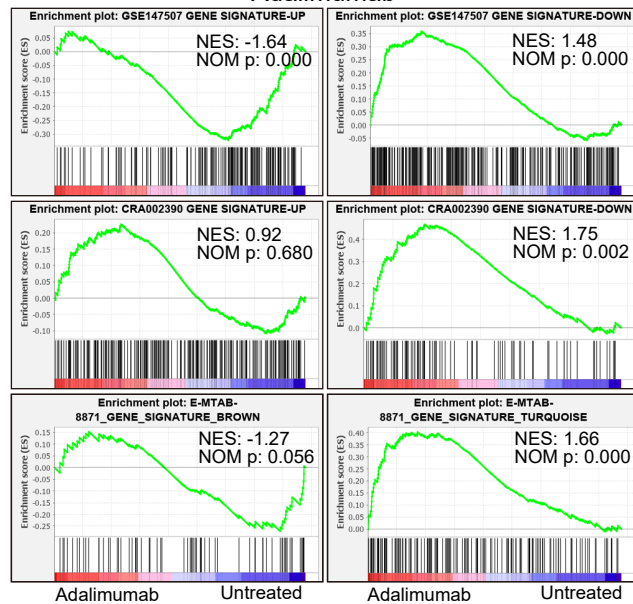**C****Tocilizumab**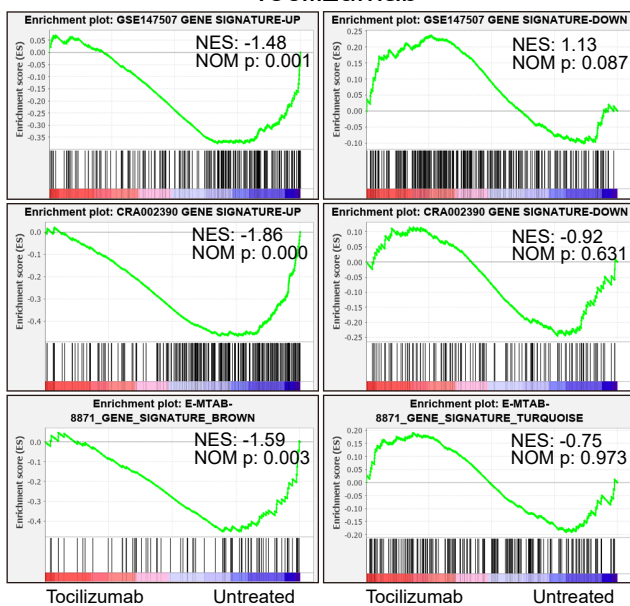**D****Siltuximab**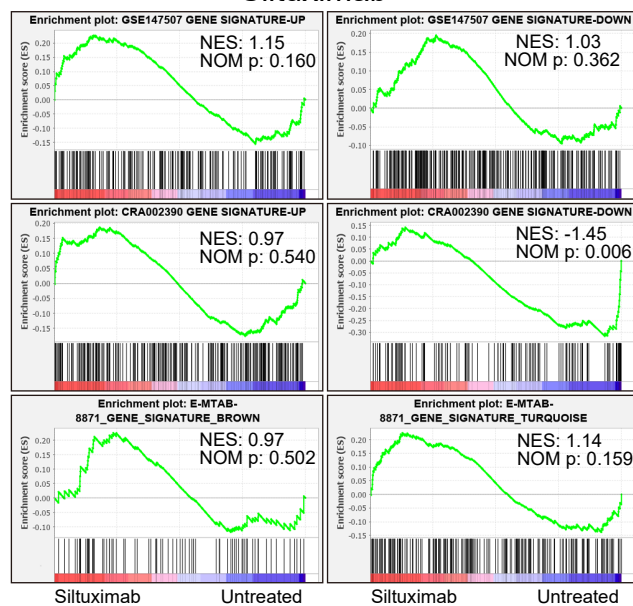

Supplement: mmc7.pdf [file mmc7.pdf]

**A****Rituximab**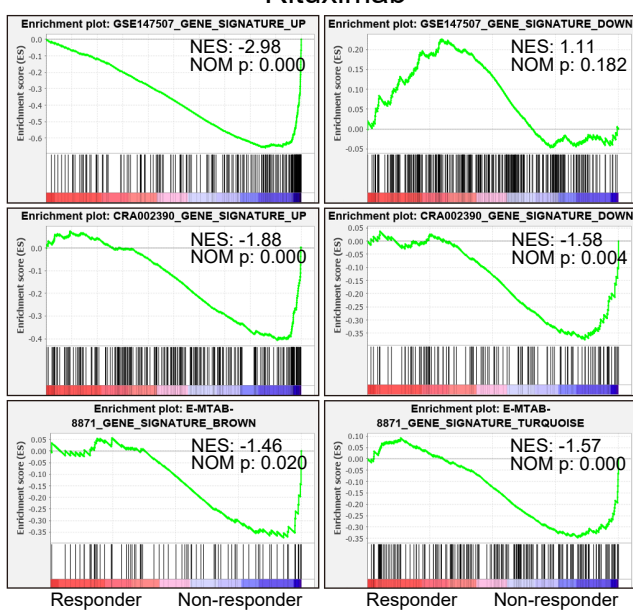**B****Methylprednisolone**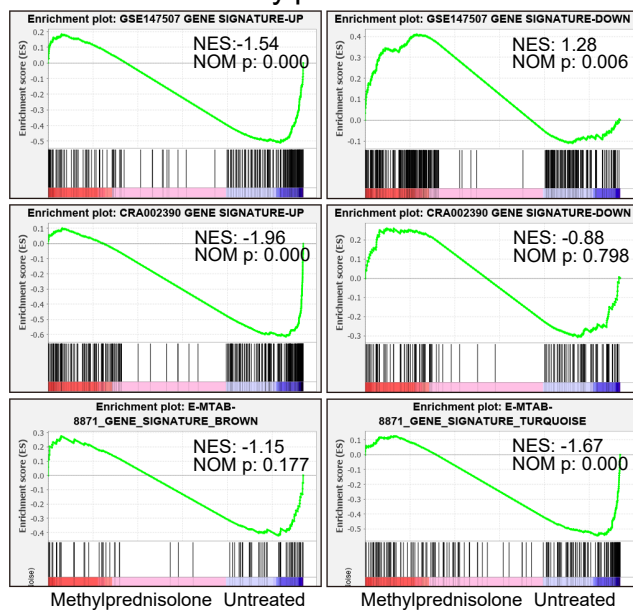**C****Prednisolone**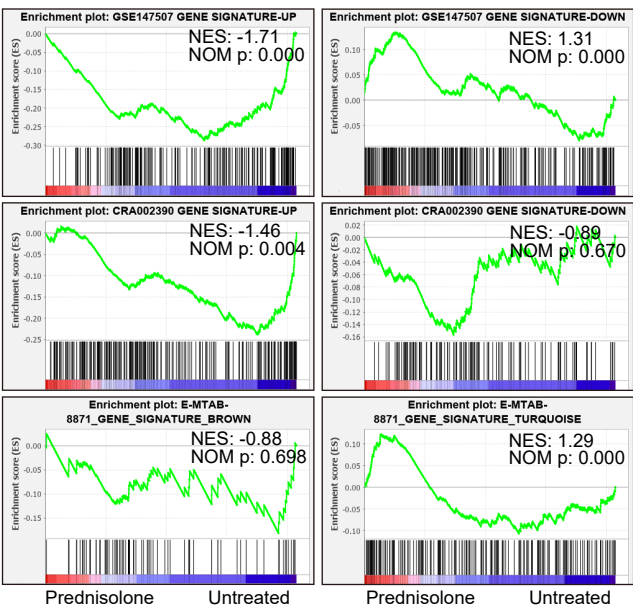**D****Ritonavir**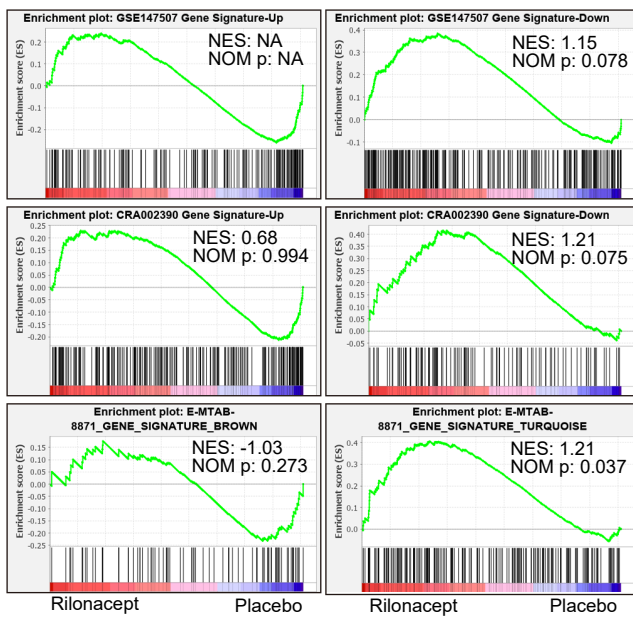

Supplement: mmc8.pdf [file mmc8.pdf]
